# Supplementary material for: A Comprehensive Characterization of Biodegradable Edible Films Based on Potato Peel Starch Plasticized with Glycerol
Source: MDPI journal article supplement (doi:10.3390/polym14173462), 2022-08-25
Supplement: s1 [file s1]

## Supplementary data

### A Comprehensive Characterization of Biodegradable Edible Films Based on Potato Peel Starch Plasticized with Glycerol

<sup>1</sup> Department of Tropical Agriculture and International Cooperation, National Pingtung University of Science and Technology, 1 Shuefu Road, Neipu, Pingtung 91201, Taiwan

<sup>2</sup> International Master Degree Program in Food Science, National Pingtung University of Science and Technology, 1 Shuefu Road, Neipu, Pingtung 91201, Taiwan

<sup>3</sup> Department of Marine, Faculty of Fisheries and Marine, Universitas Airlangga, Campus C UNAIR, Mulyorejo, Surabaya 60115, Indonesia

\*Correspondence: alcharles@mail.npust.edu.tw

Table S1. Optimization design of potato peel starch with glycerol

| Run | Variable         |            |                 | Response       |
|-----|------------------|------------|-----------------|----------------|
|     | Temperature (°C) | Starch (%) | Plasticizer 9%) | Thickness (mm) |
| 1   | 60               | 4          | 30              | 0.08           |
| 2   | 70               | 5          | 35              | 0.1            |
| 3   | 50               | 5          | 35              | 0.1            |
| 4   | 60               | 4          | 30              | 0.09           |
| 5   | 60               | 4          | 30              | 0.09           |
| 6   | 60               | 4          | 21.591          | 0.08           |
| 7   | 70               | 5          | 25              | 0.1            |
| 8   | 60               | 4          | 30              | 0.09           |
| 9   | 60               | 4          | 30              | 0.09           |
| 10  | 70               | 3          | 25              | 0.05           |
| 11  | 70               | 3          | 35              | 0.06           |
| 12  | 50               | 5          | 25              | 0.1            |
| 13  | 60               | 5.68       | 30              | 0.11           |
| 14  | 76.82            | 4          | 30              | 0.09           |
| 15  | 60               | 2.3821     | 30              | 0.05           |
| 16  | 50               | 3          | 25              | 0.05           |
| 17  | 60               | 4          | 38.409          | 0.09           |
| 18  | 43.1821          | 4          | 30              | 0.09           |
| 19  | 50               | 3          | 35              | 0.06           |
| 20  | 60               | 4          | 30              | 0.09           |

Table S2. Response of optimization Design of potato peel starch with glycerol

| Response      | Model  | Regression | F-Model/Lack of fit | p Value model/lack of fit | Model/Lack of fit            |
|---------------|--------|------------|---------------------|---------------------------|------------------------------|
| Thickness(mm) | Linear | 0.9364     | 78.48/1.38          | <0.0001/0.3808            | Significant/ not significant |

Table S3. Equation model suggestion for optimization design of potato peel starch with glycerol

| Response       | Equation <sup>1</sup>                  |
|----------------|----------------------------------------|
| Thickness (mm) | 0.0813–0.000009.985A+0.0193 B+0.0012 C |

<sup>1</sup>A; Temperature; B: Starch; C: Plasticizer

Table S4. Point prediction from optimization design of potato peel starch with glycerol

| Temperature<br>(°C) | Starch (%) | Plasticizer (%) | Thickness (mm) |
|---------------------|------------|-----------------|----------------|
| 51.986              | 4.48       | 26.52           | 0.096          |
